# Supplementary material for: Pectobacterium parmentieri SCC 3193 Mutants with Altered Synthesis of Cell Surface Polysaccharides Are Resistant to N4-Like Lytic Bacteriophage ϕA38 (vB_Ppp_A38) but Express Decreased Virulence in Potato (Solanum tuberosum L.) Plants
Source: MDPI journal article supplement (doi:10.3390/ijms22147346), 2021-07-08
Supplement: s1 [file s1]

## Supplementary Materials:

# ***Pectobacterium parmentieri* SCC 3193 Mutants with Altered Synthesis of Cell Surface Polysaccharides are Resistant to N4-Like Lytic Bacteriophage $\phi$ A38 (vB\_Ppp\_A38) but Express Decreased Virulence in Potato (*Solanum tuberosum* L.) Plants**

Przemysław Bartnik <sup>1</sup>, Sylwia Jafra <sup>2</sup>, Magdalena Narajczyk <sup>3</sup>, Paulina Czaplewska <sup>4</sup> and Robert Czajkowski <sup>1,\*</sup>

<sup>1</sup> Laboratory of Biologically Active Compounds, Intercollegiate Faculty of Biotechnology UG and MUG, University of Gdansk, Antoniego Abrahama 58, 80-307 Gdansk, Poland; bartnikprzemyslaw@gumed.edu.pl

<sup>2</sup> Laboratory of Plant Microbiology, Intercollegiate Faculty of Biotechnology UG and MUG, University of Gdansk, Antoniego Abrahama 58, 80-307 Gdansk, Poland; sylwia.jafra@ug.edu.pl

<sup>3</sup> Laboratory of Electron Microscopy, Faculty of Biology, University of Gdansk, Wita Stwosza 59, 80-308, Gdansk, Poland; magdalena.narajczyk@ug.edu.pl

<sup>4</sup> Laboratory of Mass Spectrometry-Core Facility Laboratories, Intercollegiate Faculty of Biotechnology UG and MUG, University of Gdansk, Antoniego Abrahama 58, 80-307 Gdansk, Poland; paulina.czaplewska@ug.edu.pl

\* Correspondence: robert.czajkowski@ug.edu.pl; Tel.: +0048-58-523-63-33

**Supplementary Material.** Draft genome sequences of the seven Tn5 phage-resistant mutants (M4, M26, M205, M392, M465, M603 and M649) used to in detail localize the Tn5 transposon insertions in the genome of *P. parmentieri* strain SCC3193. Draft genome sequences are in FASTA format and compressed with Windows Zip.

a)

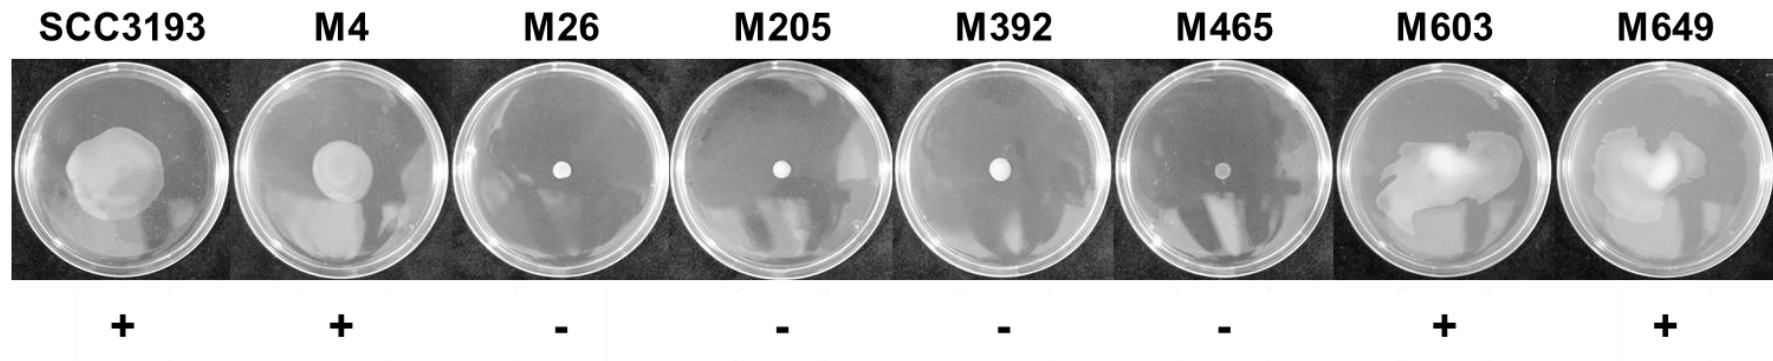

b)

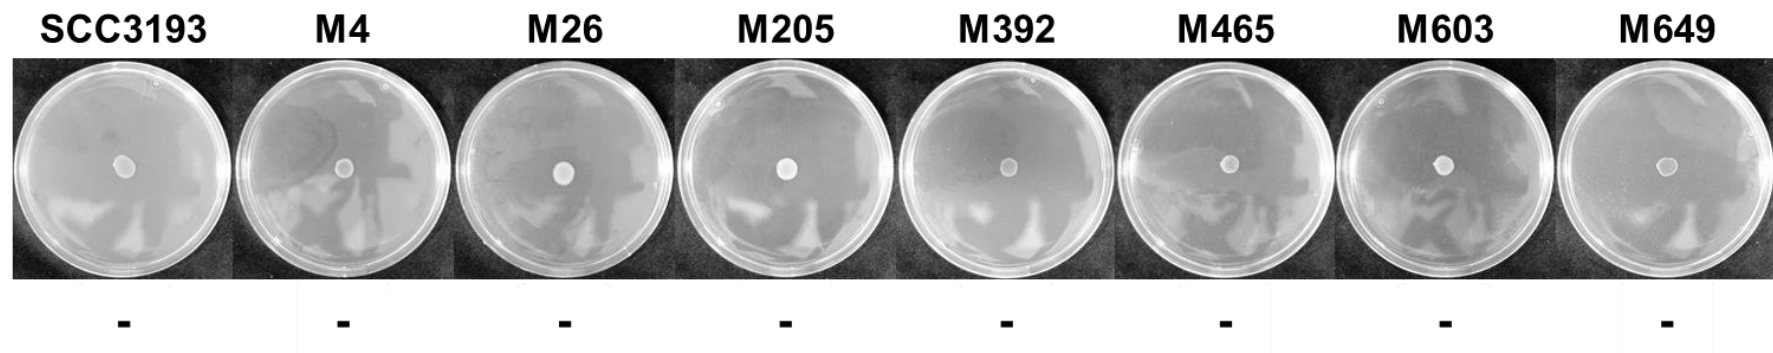

**Figure S1.** Assessment of swimming (a) and swarming (b) motility of SCC3193 WT strain and seven phage-resistant mutants (M4, M26, M205, M392, M465, M603 and M649). Representative photos are shown. (+) – indicates motility, (-) – indicates the lack of motility.

**SCC3193**

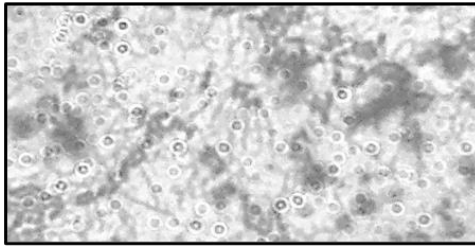

**M4**

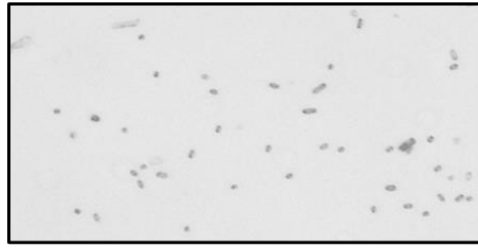

**M26**

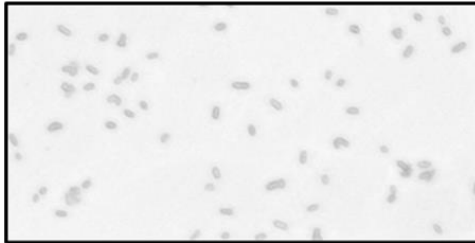

**M205**

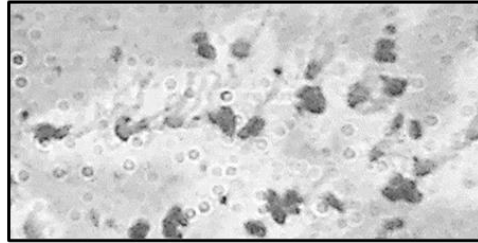

**M392**

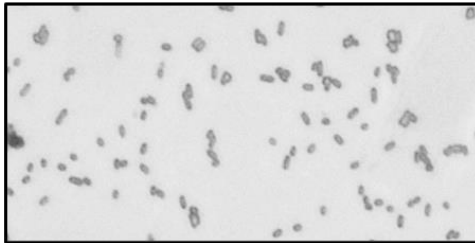

**M465**

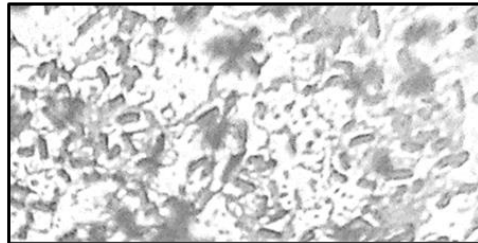

**M603**

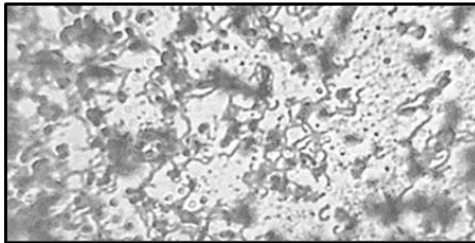

**M649**

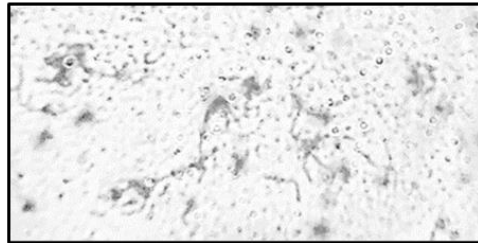

**Figure S2.** Visualization of the presence/absence of flagella of SCC3193 WT strain and seven phage-resistant mutants (M4, M26, M205, M392, M465, M603 and M649). Flagella staining was done using Ryu staining solution as described in [97]. Representative photos are shown.

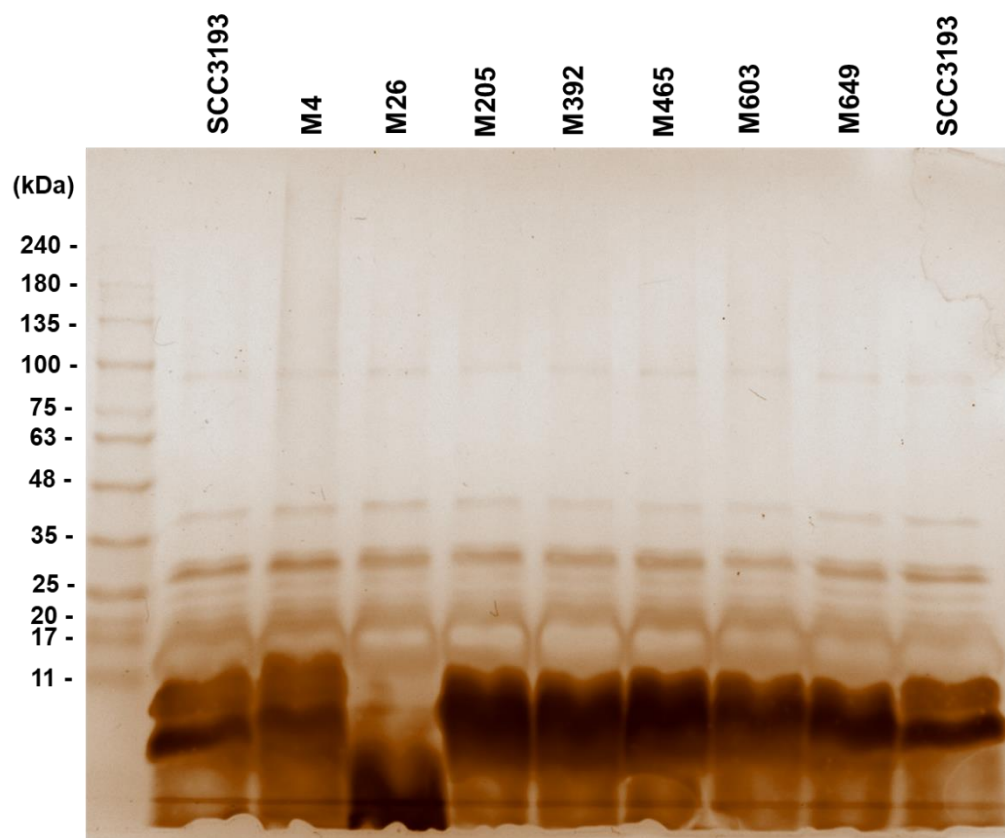

**Figure S3.** Characterization of lipopolysaccharide from wild type *P. parmentieri* strain SCC 3193 and seven phage-resistant mutants. (a) SDS-PAGE was performed using a gradient (4–20 %) polyacrylamide gel, and the LPS components were visualized by silver staining [77]. The size marker (11–245 kDa, Perfect Tricolor Protein Ladder, EURx, Poland) is shown in the first lane.
